# Supplementary material for: Can 3 mg·kg−1 of Caffeine Be Used as An Effective Nutritional Supplement to Enhance the Effects of Resistance Training in Rugby Union Players?
Source: MDPI journal article supplement (doi:10.3390/nu13103367), 2021-09-25
Supplement: s1 [file s1]

## Supplementary Data S1

**Table S1** Acute effect of caffeine treatment (3 mg·kg<sup>-1</sup>) pre-and post-7-week resistance training programme on readiness to invest effort physically, readiness to invest effort mentally, and felt arousal scale.

|                     |            | Caffeine Group |          |          |         | Placebo Group |         |          |         |
|---------------------|------------|----------------|----------|----------|---------|---------------|---------|----------|---------|
|                     |            | Placebo        |          | Caffeine |         | Placebo       |         | Caffeine |         |
|                     | Time (min) | Pre            | Post     | Pre      | Post    | Pre           | Post    | Pre      | Post    |
| <i>RTE Physical</i> | Pre        | 5.3±2.3        | 5.5±2.6  | 6.1±3.1  | 5.8±2.8 | 5.9±2.6       | 4.7±2.4 | 5.8±2.7  | 4.5±2.7 |
|                     | 15         | 5.8±2.4        | 6.2±2.3  | 6.6±2.9  | 6.0±2.5 | 6.5±2.4       | 5.3±2.2 | 6.7±2.1  | 5.1±2.7 |
|                     | 30         | 6.1±2.4        | 6.3±2.2  | 6.9±2.7  | 6.6±2.2 | 6.7±2.4       | 6.0±1.5 | 7.1±2.0  | 5.5±2.6 |
|                     | 45         | 6.4±2.5        | 6.5±2.3  | 7.2±2.6  | 6.9±2.4 | 7.1±2.1       | 5.8±1.9 | 7.1±2.3  | 5.7±2.4 |
| <i>RTE Mental</i>   | Pre        | 5.6±1.9        | 5.4±2.5  | 5.8±2.7  | 5.6±3.0 | 5.6±2.7       | 4.6±2.5 | 5.9±2.7  | 4.6±2.1 |
|                     | 15         | 5.9±1.6        | 5.6±2.2  | 6.1±2.2  | 5.7±2.5 | 6.2±2.1       | 4.7±2.1 | 6.9±2.1  | 5.1±2.3 |
|                     | 30         | 6.5±1.9        | 6.0±2.1  | 6.4±2.4  | 7.5±3.6 | 6.9±2.3       | 5.5±2.0 | 7.0±2.1  | 5.5±2.3 |
|                     | 45         | 6.5±2.1        | 9.1±11.8 | 6.9±2.3  | 6.5±2.3 | 7.4±2.0       | 5.5±1.9 | 7.1±2.4  | 6.1±2.3 |
| FAS                 | Pre        | 2±1            | 3±1      | 3±1      | 3±1     | 3±1           | 2±1     | 3±1      | 3±1     |
|                     | 15         | 3±1            | 3±1      | 3±1      | 3±1     | 3±1           | 3±1     | 3±1      | 3±1     |
|                     | 30         | 3±1            | 3±1      | 3±1      | 3±1     | 3±1           | 3±1     | 4±1      | 4±1     |
|                     | 45         | 4±1            | 3±1      | 4±1      | 4±1     | 4±1           | 3±1     | 4±1      | 4±1     |

Note: Values are represented as means ± SD, RTE = Readiness to Invest Effort, FAS = Felt Arousal Scale, Pre = pre-ingestion, and Post= post-ingestion.

## Supplementary Data S2

**Table S2** Effect of caffeine treatment (3 mg·kg<sup>-1</sup>) during the 7-week resistance training programme on sessional RPE.

|            |       | CP   |      | SSP  |      | SQ   |      | DL   |      | PC   |      | HC   |      |
|------------|-------|------|------|------|------|------|------|------|------|------|------|------|------|
|            |       | PL   | CF   |
| Session 1  | Set 1 | 16±3 | 16±2 | 17±1 | 15±5 | 17±1 | 17±2 | 17±2 | 16±2 | 17±2 | 17±1 | 17±2 | 16±2 |
|            | Set 2 | 18±3 | 17±2 | 16±5 | 18±1 | 18±1 | 18±2 | 18±1 | 18±2 | 18±1 | 17±2 | 18±1 | 18±2 |
| Session 2  | Set 1 | 16±3 | 16±1 | 17±1 | 16±2 | 16±1 | 16±1 | 16±1 | 16±1 | 17±2 | 17±1 | 17±1 | 16±2 |
|            | Set 2 | 17±4 | 17±2 | 16±5 | 18±1 | 18±1 | 17±2 | 17±1 | 16±5 | 17±2 | 18±1 | 18±1 | 18±1 |
| Session 3  | Set 1 | 16±3 | 17±1 | 17±2 | 17±1 | 17±2 | 17±1 | 17±2 | 17±1 | 17±1 | 17±1 | 17±2 | 17±1 |
|            | Set 2 | 16±4 | 18±0 | 18±1 | 15±8 | 18±0 | 18±1 | 18±1 | 18±0 | 17±2 | 18±0 | 18±0 | 18±1 |
| Session 4  | Set 1 | 16±3 | 16±1 | 17±1 | 17±1 | 17±1 | 16±2 | 17±1 | 17±2 | 17±1 | 17±1 | 17±1 | 17±1 |
|            | Set 2 | 16±4 | 17±1 | 15±7 | 18±1 | 18±1 | 17±1 | 19±1 | 18±0 | 18±1 | 18±1 | 18±1 | 17±1 |
| Session 5  | Set 1 | 16±4 | 17±1 | 17±1 | 17±1 | 18±1 | 17±1 | 18±1 | 17±1 | 17±2 | 17±1 | 17±1 | 16±2 |
|            | Set 2 | 18±3 | 18±1 | 18±1 | 18±0 | 18±1 | 18±1 | 18±1 | 18±1 | 17±1 | 18±0 | 18±1 | 17±2 |
| Session 6  | Set 1 | 16±3 | 17±1 | 17±2 | 17±2 | 17±2 | 17±1 | 18±1 | 17±1 | 17±1 | 17±1 | 17±1 | 17±1 |
|            | Set 2 | 17±3 | 17±2 | 17±5 | 18±1 | 18±1 | 18±1 | 19±1 | 18±1 | 17±2 | 17±2 | 17±6 | 18±1 |
| Session 7  | Set 1 | 17±2 | 17±1 | 17±2 | 16±1 | 17±1 | 17±1 | 17±1 | 17±1 | 17±1 | 17±1 | 17±1 | 17±1 |
|            | Set 2 | 17±2 | 18±1 | 18±1 | 18±1 | 18±1 | 18±1 | 18±1 | 18±1 | 18±1 | 18±1 | 18±1 | 16±6 |
| Session 8  | Set 1 | 16±3 | 17±1 | 18±1 | 17±1 | 17±2 | 16±2 | 18±1 | 17±1 | 18±1 | 17±1 | 17±2 | 17±1 |
|            | Set 2 | 17±3 | 18±1 | 18±1 | 18±1 | 18±1 | 17±1 | 18±1 | 18±0 | 18±1 | 18±1 | 18±1 | 18±1 |
| Session 9  | Set 1 | 17±2 | 17±1 | 18±1 | 17±1 | 17±1 | 17±1 | 17±1 | 17±1 | 17±1 | 17±1 | 17±1 | 17±1 |
|            | Set 2 | 17±3 | 18±1 | 16±5 | 18±0 | 18±1 | 18±1 | 18±1 | 18±1 | 18±1 | 17±1 | 18±1 | 18±1 |
| Session 10 | Set 1 | 16±3 | 17±1 | 17±1 | 17±1 | 17±1 | 17±1 | 17±1 | 17±2 | 17±1 | 17±1 | 18±1 | 17±1 |
|            | Set 2 | 17±3 | 18±0 | 18±1 | 18±1 | 18±1 | 18±2 | 18±1 | 18±2 | 18±1 | 18±1 | 18±1 | 18±1 |
| Session 11 | Set 1 | 17±3 | 17±1 | 17±1 | 17±1 | 17±1 | 17±1 | 18±1 | 17±1 | 17±1 | 17±1 | 18±1 | 17±1 |
|            | Set 2 | 19±2 | 18±1 | 18±1 | 18±1 | 18±1 | 17±1 | 18±1 | 18±2 | 18±1 | 18±1 | 19±1 | 16±5 |
| Session 12 | Set 1 | 17±3 | 17±1 | 17±1 | 17±1 | 17±1 | 17±1 | 17±2 | 18±2 | 17±1 | 17±1 | 17±1 | 17±1 |
|            | Set 2 | 17±3 | 16±5 | 18±1 | 17±6 | 18±1 | 18±1 | 17±2 | 18±1 | 17±1 | 17±5 | 16±6 | 18±1 |
|            | Set 1 | 15±3 | 18±1 | 18±1 | 17±1 | 16±5 | 17±1 | 18±1 | 18±1 | 18±1 | 18±1 | 18±1 | 17±1 |

|               |       |      |      |      |      |      |      |      |      |      |      |      |      |
|---------------|-------|------|------|------|------|------|------|------|------|------|------|------|------|
| Session<br>13 | Set 2 | 18±2 | 16±6 | 18±1 | 18±1 | 18±1 | 18±1 | 19±1 | 18±1 | 18±1 | 18±1 | 19±1 | 18±1 |
| Session<br>14 | Set 1 | 16±3 | 17±1 | 18±1 | 17±1 | 18±1 | 17±1 | 18±1 | 17±1 | 18±1 | 17±2 | 18±1 | 17±1 |
|               | Set 2 | 17±3 | 18±1 | 18±1 | 18±1 | 18±1 | 18±1 | 18±1 | 17±1 | 18±1 | 18±1 | 18±1 | 18±1 |

Note: Values are represented as means ± SD, RPE= Rating of Perceived Exhaustion, PL = Placebo Group, CF = Caffeine Group, CP= Chest Press, SSP= Seated Shoulder Press, SQ= Squats, DL = Deadlift, PC = Power Clean, HC = Hang Clean.
